# Supplementary material for: Tyrosine 92 of aristolochene synthase directs cyclisation of farnesyl pyrophosphateElectronic supplementary information (ESI) available: GC-profiles of co-injections of 4 from ASY92V and authentic material and mass spectra of 4 produced by ASY92V and an authentic sample. See http://www.rsc.org/suppdata/cc/b2/b206517g/
Source: Royal Society of Chemistry journal article supplement (doi:10.1039/b206517g), 2002-09-19
Supplement: b206517g.doc [file b206517g.doc]

**Supplementary Material 1:** Co-injection of the products of ASY92V with authentic -(E)-farnesene reveals the identity of **4**.

**A**: GC-trace from an injection of authentic -(E)-farnesene. *: Impurities in the -(E)-farnesene sample.

**B**: Products produced by ASY92V on incubation with farnesyl-pyrophosphate (**1**).

**C**: Co-injection of -(E)-farnesene standard and the ASY92V products. Note the doubling of the intensity of peak 4 while the intensity of the other peaks remains unchanged.

Method: The hexane extractable products of an incubation of **1** with ASY92V and of -(E)-farnesene were analysed by GC-MS using a Carlo Erba CE8000 gas chromatograph (equipped with a BPX5 30 m column).


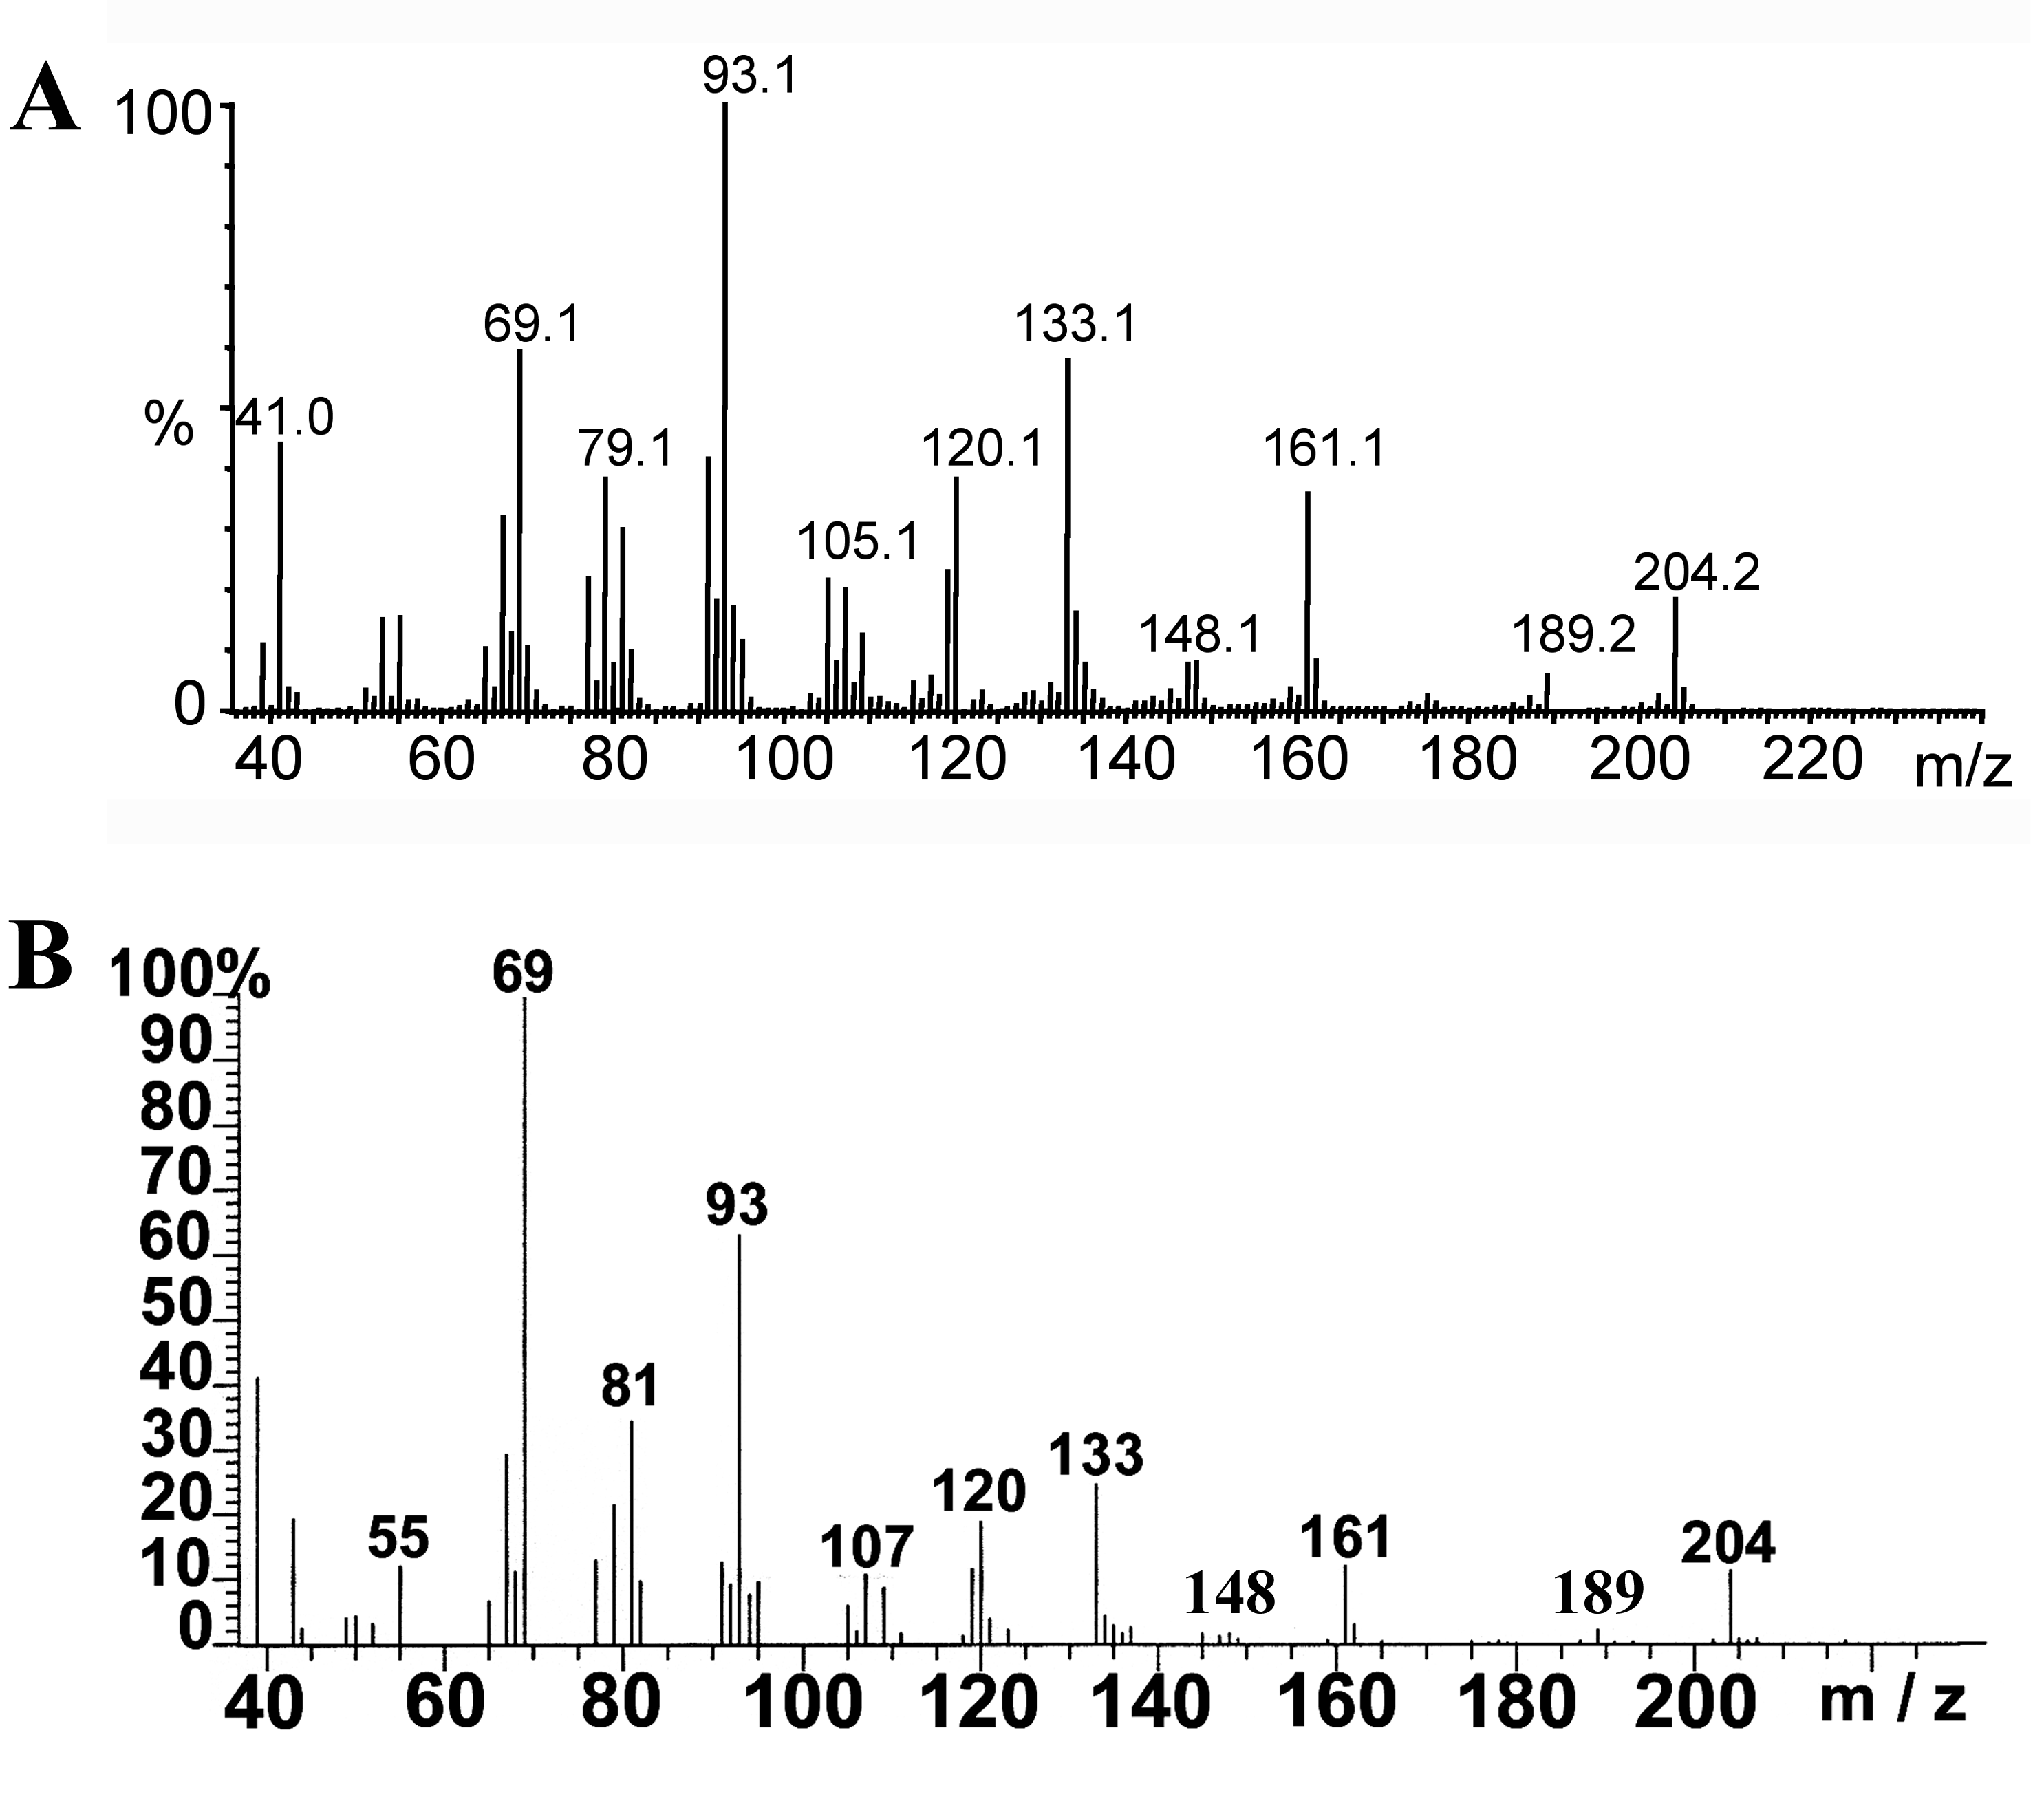


**Supplementary Material 2:** Product **4** from ASY92V is -(E)-farnesene.

**A:** MS of peak **4** of the GC –trace in Figure 1 run on a Micromass GCTTM with an integrated GC (HP6890 equipped with a 30 m DB5 column).

**B**: MS of the GC-peak of a standard of -(E)-farnesene a Carlo Erba CE8000 gas chromatograph (equipped with a BPX5 30 m column) and a Prospec Mass spectrometer.
